# Supplementary material
Source: PubMed Central journal article supplement (PMC3482625)
Supplement: NIHMS312790-supplement-1_si_001.pdf [file NIHMS312790-supplement-1_si_001.pdf]

## Supporting information

# Logistic Dose Response of Inhibitors on a Chip

*Jae Young Yun*<sup>1†</sup>, *Sachin Jambovane*<sup>1†</sup>, *Se-Kwon Kim*<sup>2</sup>, *Sung-Hak Cho*<sup>3</sup>, *Evert C Duin*<sup>4</sup>,  
*and Jong Wook Hong*<sup>1\*</sup>

<sup>1</sup>Materials Research and Education Center, Department of Mechanical Engineering,  
Auburn University, Auburn, AL 36849,

<sup>2</sup>Marine Bioprocess Research Center, Pukyong National University,  
Busan, 608-737, Korea

<sup>3</sup>Nanomachining Laboratories, Korea Institute of Machinery and Materials, Daejeon, Korea

<sup>4</sup>Department of Chemistry and Biochemistry, Auburn University

†These authors contributed equally to this work

\*Corresponding author

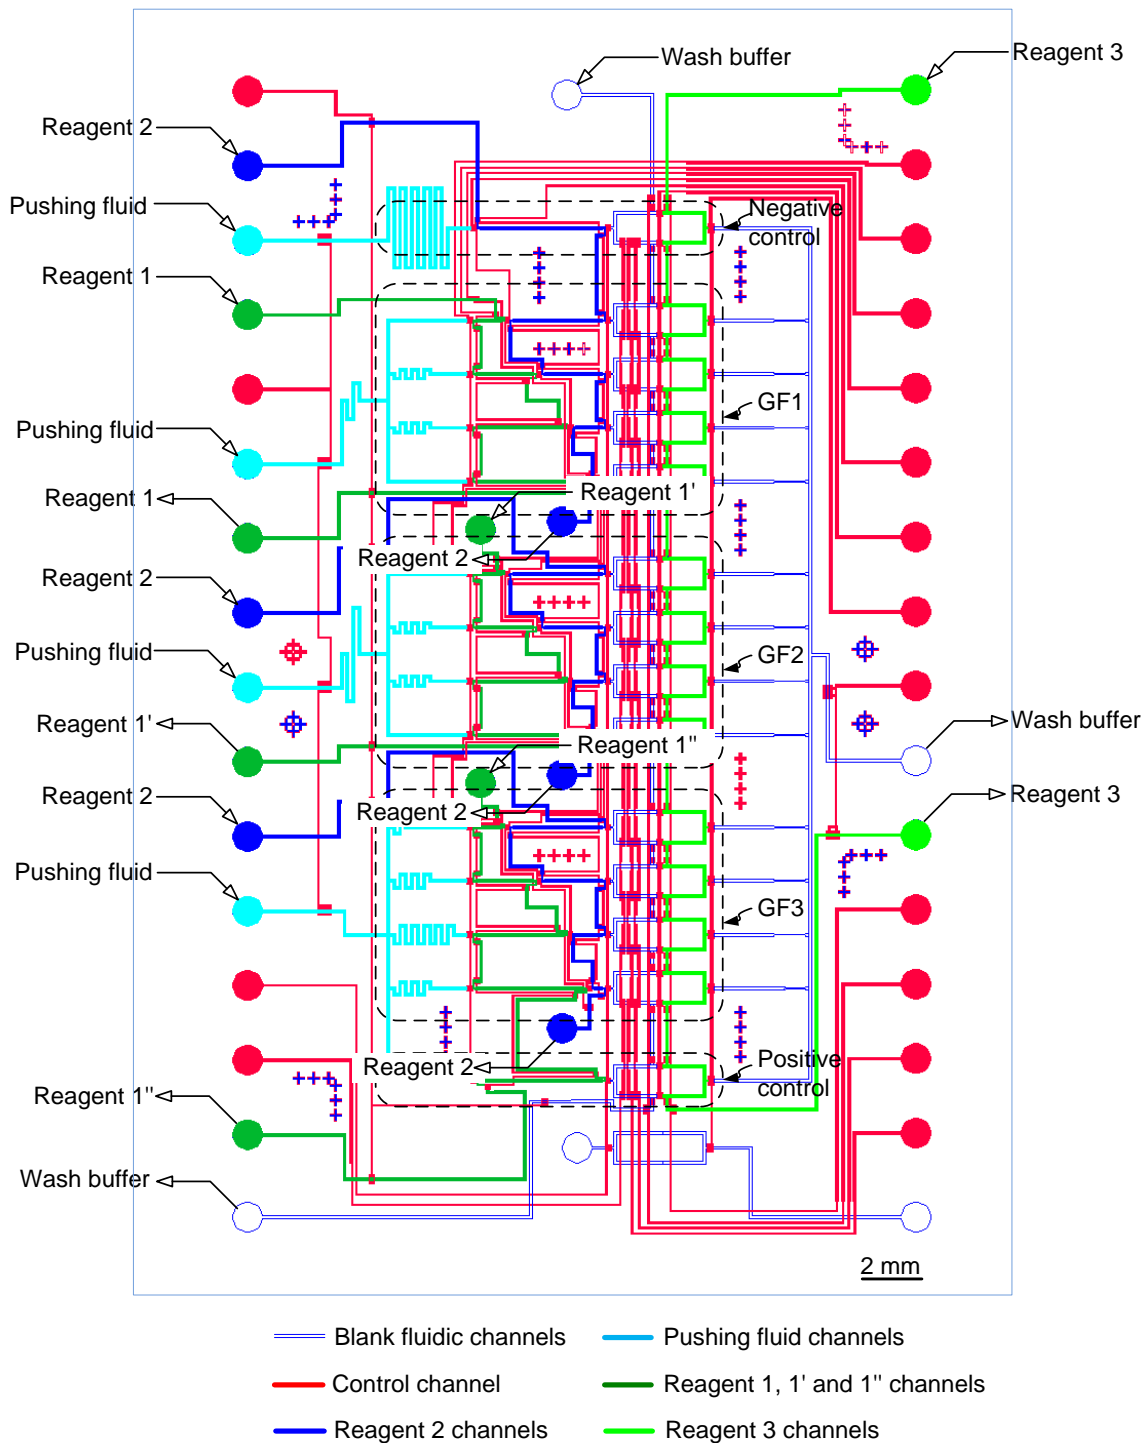

**Figure S1.** Device structure and channels network.

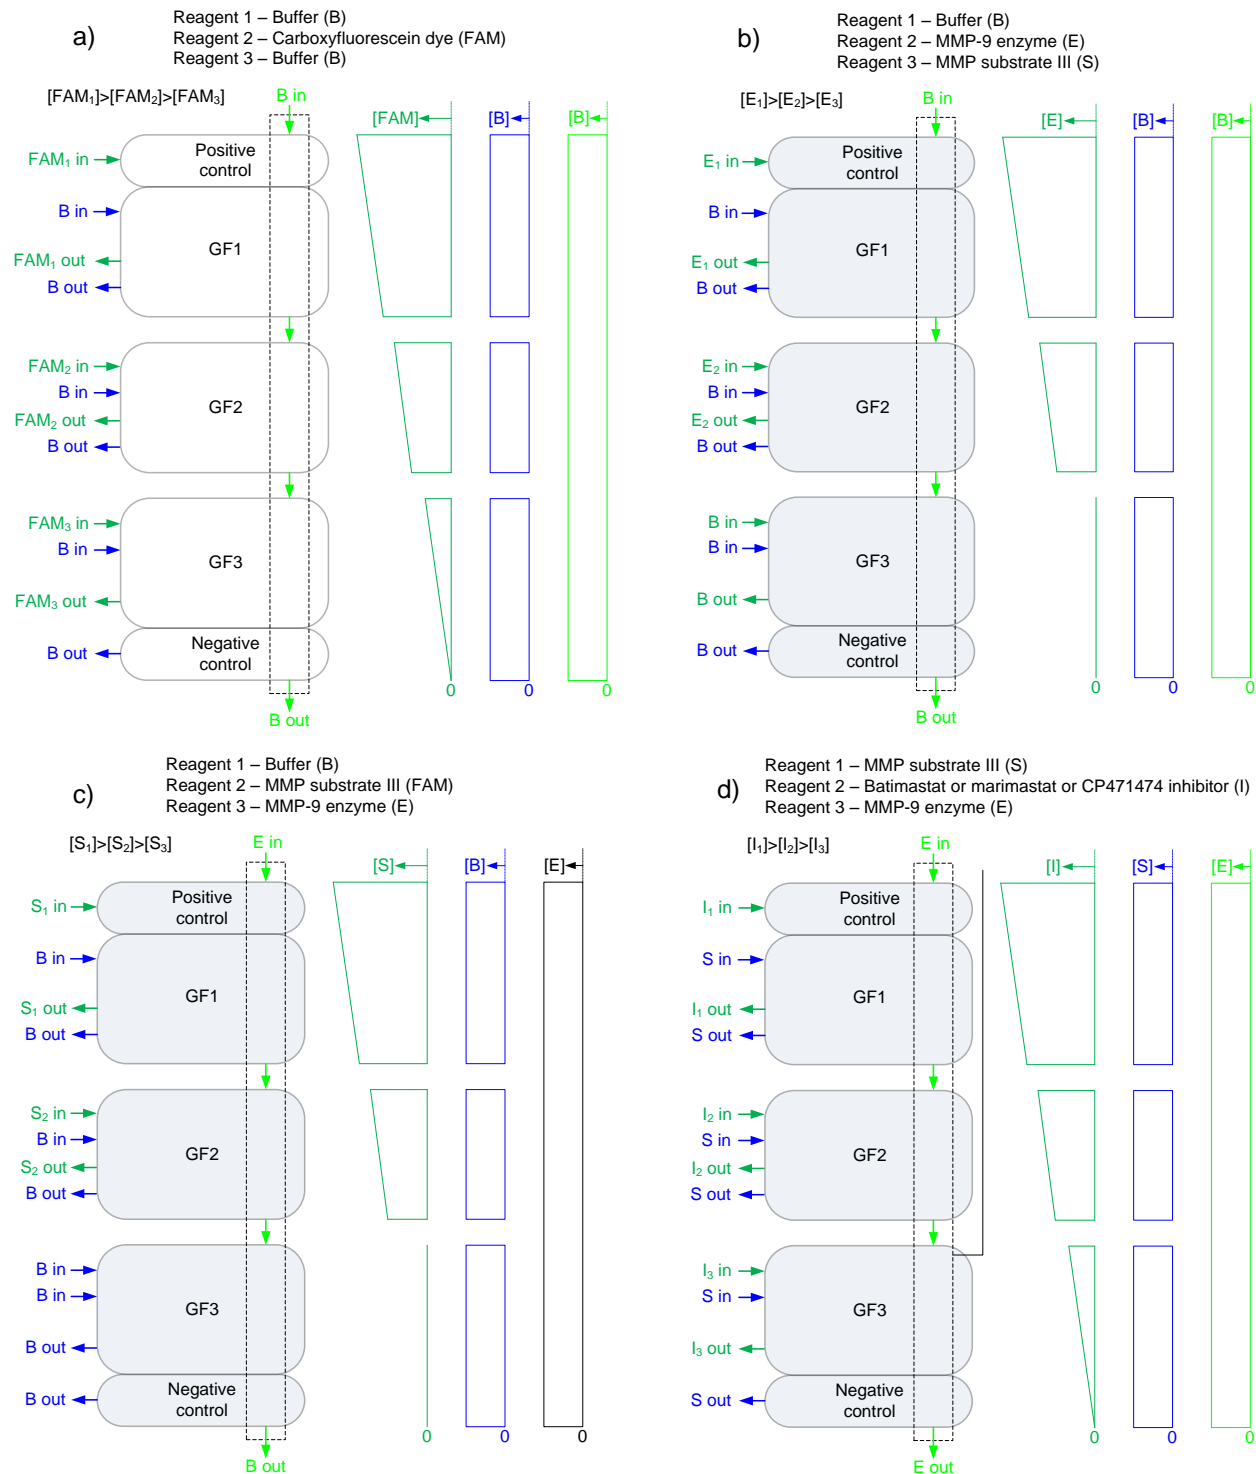

**Figure S2.** Reagent introduction to the chip for obtaining (a) standard curve of FAM, (b) Enzyme gradient, (c) Substrate gradient, and (d) Inhibitor dose response analysis

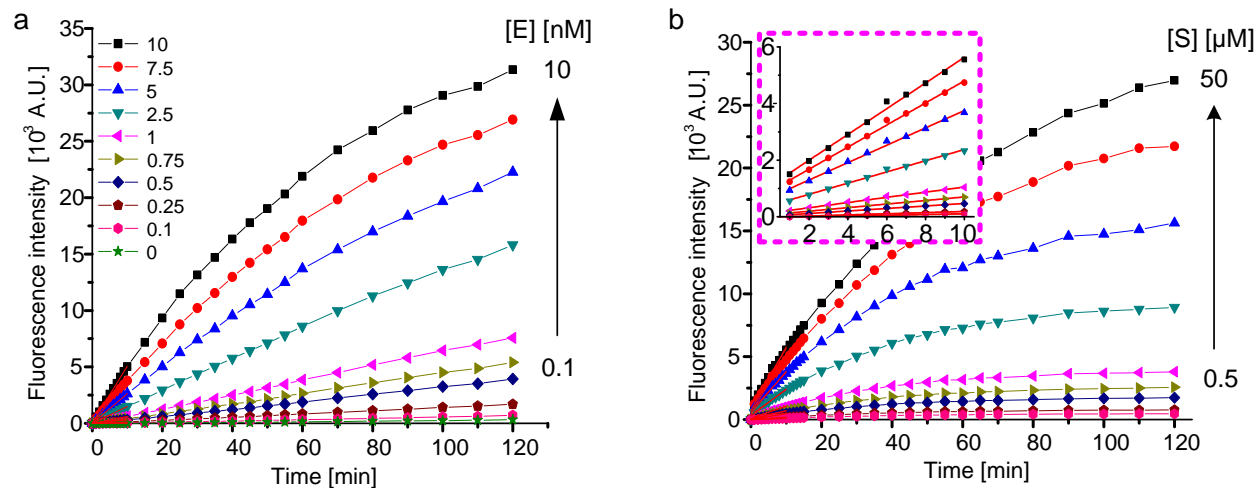

**Figure S3.** Traces using on-chip method for (a) Enzyme gradient, and (b) Substrate gradient
